# Supplementary material for: Comparative Proteomic Analysis of Proteins Involved in Bioenergetics Pathways Associated with Human Sperm Motility
Source: PubMed Central journal article supplement (PMC6627292; doi:10.3390/ijms20123000), 2019-06-19
Supplement: ijms-20-03000-s001.pdf [file ijms-20-03000-s001.pdf]

## Supplementary Materials

**Table S1.** Details of proteins reported in Figure 2 panel A. List of proteins up- and down-regulated in samples with medium progressive motility with respect to high progressive motility group identified by LC-MS/MS analysis. Results are expressed as ratios of protein levels of asthenozoospermics to normozoospermics.

| UniProt ID | Gene Name | Protein Name                                                   | Medium/High |
|------------|-----------|----------------------------------------------------------------|-------------|
| P20273     | CD22      | B-cell receptor CD22                                           | 0.14        |
| Q8IYQ7     | THNS1     | Threonine synthase-like 1                                      | 0.19        |
| Q99523     | SORT      | Sortilin                                                       | 0.22        |
| P82933     | RT09      | 28S ribosomal protein S9                                       | 0.26        |
| Q14156     | EFR3A     | Protein EFR3 homolog A                                         | 0.27        |
| Q9BWH2     | FUND2     | FUN14 domain-containing protein 2                              | 0.28        |
| Q5RI15     | COX20     | Cytochrome c oxidase assembly protein COX20                    | 0.31        |
| P53597     | SUCA      | Succinate-CoA ligase                                           | 0.31        |
| Q9BTX1     | NDC1      | Nucleoporin NDC1                                               | 0.33        |
| P15529     | MCP       | Membrane cofactor protein (TLX)                                | 0.35        |
| Q8TEM1     | PO210     | Nuclear pore membrane glycoprotein 210                         | 0.36        |
| Q8NBX0     | SCPDL     | Saccharopine dehydrogenase-like oxidoreductase                 | 0.37        |
| Q9P2R7     | SUCB1     | Succinate-CoA ligase [ADP-forming] subunit beta                | 0.37        |
| Q99661     | KIF2C     | Kinesin-like protein KIF2C                                     | 0.38        |
| P02750     | A2GL      | Leucine-rich alpha-2-glycoprotein                              | 0.39        |
| Q6UN15     | FIP1      | Pre-mRNA 3'-end-processing factor FIP1                         | 0.40        |
| P11310     | ACADM     | Medium-chain specific acyl-CoA dehydrogenase                   | 0.41        |
| Q99798     | ACON      | Aconitate hydratase                                            | 0.42        |
| P55809     | SCOT1     | Succinyl-CoA:3-ketoacid coenzyme A transferase 1               | 0.43        |
| P08574     | CY1       | Cytochrome c1                                                  | 0.44        |
| O14672     | ADA10     | Disintegrin and metalloproteinase domain-containing protein 10 | 0.46        |
| Q13438     | OS9       | Protein OS-9                                                   | 0.46        |
| Q16698     | DECR      | 2,4-dienoyl-CoA reductase                                      | 0.48        |
| Q92820     | GGH       | Gamma-glutamyl hydrolase                                       | 0.48        |
| O75521     | ECI2      | Enoyl-CoA delta isomerase 2                                    | 0.50        |
| Q9BV68     | RN126     | E3 ubiquitin-protein ligase RNF126                             | 0.50        |
| O75882     | ATRN      | Attractin                                                      | 0.51        |
| P11310     | CLMN      | Calmin                                                         | 0.52        |
| P11047     | LAMC1     | Laminin subunit gamma-1                                        | 0.54        |
| P00568     | KAD1      | Adenylate kinase isoenzyme 1                                   | 0.54        |
| P11177     | ODPB      | Pyruvate dehydrogenase E1 component subunit beta               | 0.55        |
| O60502     | OGA       | Protein O-GlcNAcase                                            | 0.55        |
| Q9NZ45     | CISD1     | CDGSH iron-sulfur domain-containing protein 1                  | 0.56        |
| O00483     | NDUA4     | Cytochrome c oxidase subunit NDUF4                             | 0.56        |
| P06744     | G6PI      | Saccharopine dehydrogenase-like oxidoreductase                 | 0.57        |
| Q9H3G5     | CPVL      | Probable serine carboxypeptidase CPVL                          | 0.58        |
| P29218     | IMPA1     | Inositol monophosphatase 1                                     | 0.58        |
| P17174     | AATC      | Aspartate aminotransferase                                     | 0.59        |
| P28070     | PSB4      | Proteasome subunit beta type-4                                 | 0.60        |
| P13987     | CD59      | CD59 glycoprotein                                              | 0.60        |
| P25705     | ATPA      | ATP synthase subunit alpha                                     | 0.60        |
| P57105     | SYJ2B     | Synaptojanin-2-binding protein                                 | 0.61        |
| Q00765     | REEP5     | Receptor expression-enhancing protein 5                        | 0.61        |
| P07686     | HEXB      | Beta-hexosaminidase subunit beta                               | 0.63        |
| P0C7H8     | KAP2      | Keratin-associated protein 2-3                                 | 0.63        |
| P0CO20     | PSA1      | Mannose-1-phosphate guanylyltransferase                        | 0.64        |
| P13073     | COX41     | Cytochrome c oxidase subunit 4 isoform 1                       | 0.67        |
| Q96HR9     | REEP6     | Receptor expression-enhancing protein 6                        | 0.68        |
| Q12805     | FBLN3     | EGF-containing fibulin-like extracellular matrix protein 1     | 0.69        |
| O00330     | ODPX      | Pyruvate dehydrogenase protein X component                     | 0.71        |
| Q86X27     | RGPS2     | Ras-specific guanine nucleotide-releasing factor RalGPS2       | 0.74        |
| P54920     | SNAA      | Alpha-soluble NSF attachment protein                           | 1.23        |

|        |       |                                                         |      |
|--------|-------|---------------------------------------------------------|------|
| P07737 | PROF1 | Profilin-1                                              | 1.30 |
| Q8WU68 | RS3   | Splicing factor U2AF 26 kDa subunit                     | 1.32 |
| O00231 | PSD11 | 26S proteasome non-ATPase regulatory subunit 11         | 1.34 |
| Q9H4A4 | AMPB  | Aminopeptidase B                                        | 1.35 |
| P13639 | EF2   | Elongation factor 2                                     | 1.36 |
| P62333 | PRS10 | 26S proteasome regulatory subunit 10B                   | 1.37 |
| P14868 | SYDC  | Aspartate-tRNA ligase                                   | 1.47 |
| Q02790 | FKBP4 | Peptidyl-prolyl cis-trans isomerase FKBP4               | 1.50 |
| Q14204 | 2AAA  | Cytoplasmic dynein 1 heavy chain 1                      | 1.55 |
| O75083 | WDR1  | WD repeat-containing protein 1                          | 1.55 |
| P15144 | RINI  | Aminopeptidase N                                        | 1.56 |
| I3B4L0 | THIC  | Multifunctional fusion protein                          | 1.57 |
| P60228 | EIF3E | Eukaryotic translation initiation factor 3 subunit E    | 1.57 |
| Q8WZ82 | OVCA2 | Esterase OVCA2                                          | 1.61 |
| P11413 | G6PD  | Glucose-6-phosphate isomerase                           | 1.69 |
| O43414 | ERI3  | ERI1 exoribonuclease 3                                  | 1.75 |
| P49773 | HINT1 | Histidine triad nucleotide-binding protein 1            | 1.76 |
| P60981 | DEST  | Destrin                                                 | 1.77 |
| Q96FW1 | OTUB1 | Ubiquitin thioesterase OTUB1                            | 1.78 |
| Q14247 | SRC8  | Src substrate cortactin                                 | 1.90 |
| O95373 | IPO7  | Importin-7                                              | 1.94 |
| Q7L1Q6 | BZW1  | Basic leucine zipper and W2 domain-containing protein 1 | 1.96 |
| P50914 | RL14  | 60S ribosomal protein L14                               | 1.97 |
| P47755 | CAZA2 | F-actin-capping protein subunit alpha-2                 | 2.06 |
| Q96RI0 | RL3   | Proteinase-activated receptor 4                         | 2.12 |
| P04839 | CY24B | Cytochrome b-245 heavy chain                            | 2.27 |
| Q86V21 | AACS  | Acetoacetyl-CoA synthetase                              | 2.28 |
| Q0Q8R6 | CA123 | Capsid scaffolding protein                              | 2.38 |
| Q9NPQ8 | RIC8A | Synembryn-A                                             | 2.44 |
| O14880 | MGST3 | Microsomal glutathione S-transferase 3                  | 2.91 |
| Q7L1Q6 | TCAF1 | TRPM8 channel-associated factor 1                       | 3.01 |
| Q6P9B6 | TLDC1 | TLD domain-containing protein 1                         | 3.14 |
| Q8NBF2 | NHLC2 | NHL repeat-containing protein 2                         | 3.14 |
| P30626 | SORCN | Sorcin                                                  | 4.81 |

**Table S2.** Details of proteins reported in Figure 3 panel A. List of proteins up- and down-regulated in samples with low progressive motility with respect to high progressive motility group identified by LC-MS/MS analysis. Results are expressed as ratios of protein levels of severe asthenozoospermics to normozoospermics.

| UniProt ID | Gene Name | Protein Name                                               | Low/High |
|------------|-----------|------------------------------------------------------------|----------|
| P04279     | SEMG1     | Semenogelin-1                                              | 0.00     |
| P19801     | AOC1      | Amiloride-sensitive amine oxidase                          | 0.10     |
| Q9NW82     | WDR70     | WD repeat-containing protein 70                            | 0.14     |
| Q9H7C9     | AAMDC     | Mth938 domain-containing protein                           | 0.16     |
| P15529     | MCP       | Membrane cofactor protein                                  | 0.17     |
| P82933     | RT09      | 28S ribosomal protein S9                                   | 0.18     |
| Q5RI15     | COX20     | Cytochrome c oxidase assembly protein COX20                | 0.22     |
| P48509     | CD151     | CD151 antigen                                              | 0.24     |
| Q12805     | FBLN3     | EGF-containing fibulin-like extracellular matrix protein 1 | 0.27     |
| Q96597     | MYADM     | Myeloid-associated differentiation marker                  | 0.29     |
| P21397     | AOFA      | Amine oxidase [flavin-containing] A                        | 0.32     |
| Q9ULC5     | ACSL5     | Long-chain-fatty-acid-CoA ligase 5                         | 0.32     |
| Q07954     | LRP1      | Prolow-density lipoprotein receptor-related protein 1      | 0.33     |

|        |       |                                                                |      |
|--------|-------|----------------------------------------------------------------|------|
| Q92820 | GGH   | Gamma-glutamyl hydrolase                                       | 0.33 |
| P41235 | HNF4A | Hepatocyte nuclear factor 4-alpha                              | 0.35 |
| Q9BTX1 | NDC1  | Nucleoporin NDC1                                               | 0.38 |
| Q92621 | NU205 | Nuclear pore complex protein                                   | 0.38 |
| Q14156 | EFR3A | Protein EFR3 homolog A                                         | 0.39 |
| Q9Y4F1 | FARP1 | FERM, ARHGEF and pleckstrin domain-containing protein 1        | 0.42 |
| P36873 | PP1G  | Protein phosphatase 1 regulatory subunit 3A                    | 0.42 |
| O94915 | FRYL  | Protein furry homolog-like                                     | 0.44 |
| Q9NRG9 | AAAS  | Aladin                                                         | 0.44 |
| Q8IYQ7 | THNS1 | Threonine synthase-like 1                                      | 0.45 |
| Q96HR9 | REEP6 | Receptor expression-enhancing protein 6                        | 0.48 |
| Q86UP2 | KTN1  | Kinectin                                                       | 0.48 |
| P17174 | AATC  | Aspartate aminotransferase                                     | 0.48 |
| P54709 | AT1B3 | Sodium/potassium-transporting ATPase subunit beta-3            | 0.49 |
| Q5JRX3 | PREP  | Prolyl endopeptidase                                           | 0.50 |
| Q00341 | VIGLN | Vigilin                                                        | 0.51 |
| P51452 | DUS3  | tRNA-dihydrouridine(47) synthase                               | 0.53 |
| Q16610 | ECM1  | Extracellular matrix protein 1                                 | 0.54 |
| P13861 | KAP2  | Keratin-associated protein 2-3                                 | 0.55 |
| O75348 | VATG1 | V-type proton ATPase subunit G 1                               | 0.55 |
| P17612 | KAPCA | cAMP-dependent protein kinase catalytic subunit alpha          | 0.58 |
| P38117 | ETFB  | Electron transfer flavoprotein subunit beta                    | 0.62 |
| Q99798 | ACON  | Aconitate hydratase                                            | 0.63 |
| P28070 | PSB4  | Proteasome subunit beta type-4                                 | 0.63 |
| P10644 | KAP0  | cAMP-dependent protein kinase type I-alpha regulatory subunit  | 0.63 |
| O14672 | ADA10 | Disintegrin and metalloproteinase domain-containing protein 10 | 0.63 |
| Q9P2R7 | SUCB1 | Succinate-CoA ligase [ADP-forming] subunit beta                | 0.64 |
| P11177 | ODPB  | Pyruvate dehydrogenase E1 component subunit beta               | 0.65 |
| P55809 | SCOT1 | Succinyl-CoA:3-ketoacid coenzyme A transferase 1               | 0.66 |
| P23786 | CPT2  | Carnitine O-palmitoyltransferase 2                             | 0.67 |
| O43837 | IDH3B | Isocitrate dehydrogenase [NAD] subunit beta                    | 0.68 |
| P25705 | ATPA  | ATP synthase subunit alpha                                     | 0.68 |
| P00492 | HPRT  | Hypoxanthine-guanine phosphoribosyltransferase                 | 0.70 |
| Q13011 | ECH1  | Delta(3,5)-Delta(2,4)-dienoyl-CoA isomerase                    | 0.85 |
| P61160 | ARP2  | Actin-related protein 2                                        | 1.25 |
| P12814 | ACTN1 | Alpha-actinin-1                                                | 1.25 |
| O00231 | PSD11 | 26S proteasome non-ATPase regulatory subunit 11                | 1.31 |
| P07602 | SAP   | SH2 domain-containing protein 1A                               | 1.34 |
| Q9BR76 | COR1B | Coronin-1B                                                     | 1.35 |
| P62249 | RS16  | 40S ribosomal protein S16                                      | 1.40 |
| P48723 | HSP13 | Heat shock 70 kDa protein 13                                   | 1.42 |
| P18085 | ARF4  | ADP-ribosylation factor 4                                      | 1.45 |
| P17980 | PRS6A | 26S proteasome regulatory subunit 6A                           | 1.50 |

|               |              |                                                                         |      |
|---------------|--------------|-------------------------------------------------------------------------|------|
| <b>P23528</b> | <i>COF1</i>  | Cofilin-1                                                               | 1.50 |
| <b>Q9HB40</b> | <i>RISC</i>  | Protein argonaute-2                                                     | 1.52 |
| <b>Q14103</b> | <i>HNRPD</i> | Heterogeneous nuclear ribonucleoprotein D0                              | 1.55 |
| <b>P49773</b> | <i>HINT1</i> | Histidine triad nucleotide-binding protein 1                            | 1.58 |
| <b>Q96FW1</b> | <i>OTUB1</i> | Ubiquitin thioesterase OTUB1                                            | 1.60 |
| <b>O60547</b> | <i>GMDS</i>  | GDP-mannose 4,6 dehydratase                                             | 1.62 |
| <b>Q9C037</b> | <i>TRIM4</i> | E3 ubiquitin-protein ligase TRIM4                                       | 1.63 |
| <b>P30153</b> | <i>2AAA</i>  | Cytoplasmic dynein 1 heavy chain 1                                      | 1.66 |
| <b>O75369</b> | <i>FLNB</i>  | Protein disulfide-isomerase                                             | 1.72 |
| <b>P07237</b> | <i>PDIA1</i> | Protein disulfide-isomerase                                             | 1.79 |
| <b>Q05655</b> | <i>KPCD</i>  | Protein kinase C delta type                                             | 1.79 |
| <b>P09525</b> | <i>ANXA4</i> | Annexin A4                                                              | 1.83 |
| <b>Q9Y2L1</b> | <i>RRP44</i> | Exosome complex exonuclease RRP44                                       | 1.85 |
| <b>P60981</b> | <i>DEST</i>  | Destrin                                                                 | 1.91 |
| <b>P41252</b> | <i>SYIC</i>  | Isoleucine-tRNA ligase                                                  | 1.93 |
| <b>Q05519</b> | <i>SRS11</i> | Serine/arginine-rich splicing factor 11                                 | 1.97 |
| <b>P35625</b> | <i>TIMP3</i> | Metalloproteinase inhibitor 3                                           | 2.06 |
| <b>Q3ZCQ8</b> | <i>TIM50</i> | Mitochondrial import inner membrane translocase subunit TIM50           | 2.06 |
| <b>O14880</b> | <i>MGST3</i> | Microsomal glutathione S-transferase 3                                  | 2.14 |
| <b>P54108</b> | <i>CRIS3</i> | Cysteine-rich secretory protein 3                                       | 2.45 |
| <b>O14657</b> | <i>TOR1B</i> | Torsin-1B                                                               | 2.47 |
| <b>Q08209</b> | <i>PP2BA</i> | Serine/threonine-protein phosphatase 2B catalytic subunit alpha isoform | 2.58 |
| <b>Q92905</b> | <i>CSN5</i>  | COP9 signalosome complex subunit 5                                      | 2.98 |
| <b>P09960</b> | <i>LKHA4</i> | Leukotriene A-4 hydrolase                                               | 3.14 |
| <b>P21980</b> | <i>TGM2</i>  | Protein-glutamine gamma-glutamyltransferase 2                           | 3.19 |
| <b>O95299</b> | <i>NDUAA</i> | NADH dehydrogenase [ubiquinone] 1 alpha subcomplex subunit 10           | 3.44 |
| <b>P30626</b> | <i>SORCN</i> | Sorcin                                                                  | 3.60 |
| <b>Q8TEK3</b> | <i>DOT1L</i> | Histone-lysine N-methyltransferase                                      | 3.62 |
| <b>Q05639</b> | <i>EF1A2</i> | Metalloproteinase inhibitor 3                                           | 3.87 |
| <b>Q9NZN4</b> | <i>EHD2</i>  | Protein Nef                                                             | 5.43 |
| <b>O00148</b> | <i>DX39A</i> | ATP-dependent RNA helicase DDX39A                                       | 5.43 |
| <b>Q9GZZ9</b> | <i>UBA5</i>  | Ubiquitin-like modifier-activating enzyme 5                             | 5.71 |
